# Supplementary material
Source: PubMed Central journal article supplement (PMC6645119)
Supplement: ao8b01577_si_001.pdf [file ao8b01577_si_001.pdf]

## Supporting Information

# **Ordered-Disordered BaZrO<sub>3-δ</sub> Hollow Nanosphere/ Carbon Dot Hybrid Nanocomposite: A New Visible- Light-Driven Efficient Composite Photocatalyst for Hydrogen Production and Dye Degradation**

*Anindya Sundar Patra, Gaurangi Gogoi and Mohammad Qureshi\**

Department of Chemistry; Indian Institute of Technology, Guwahati; Guwahati – 781039;  
Assam; India.

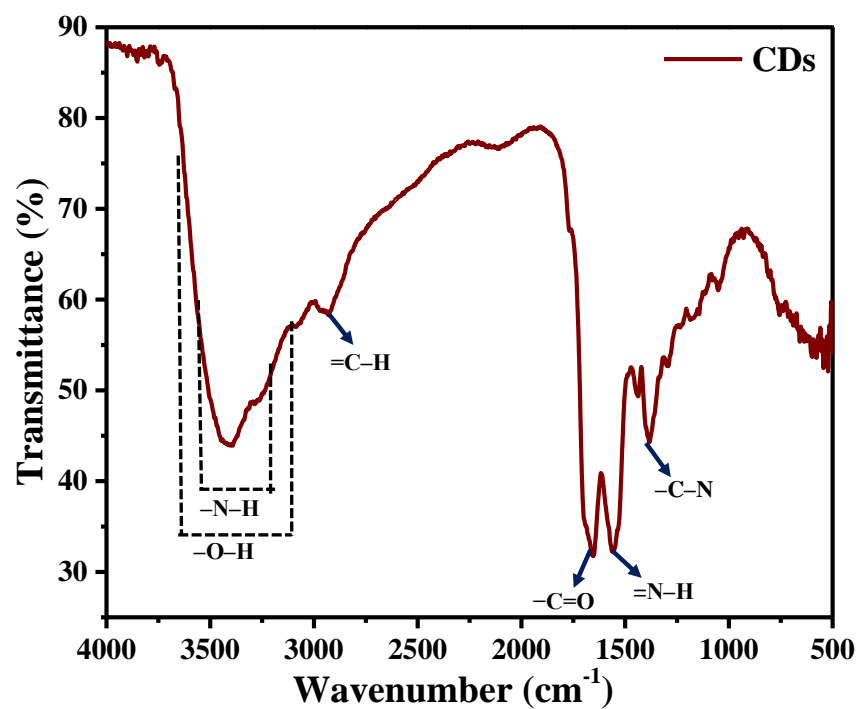

**Figure. S1** FTIR spectrum of as-synthesized CDs.

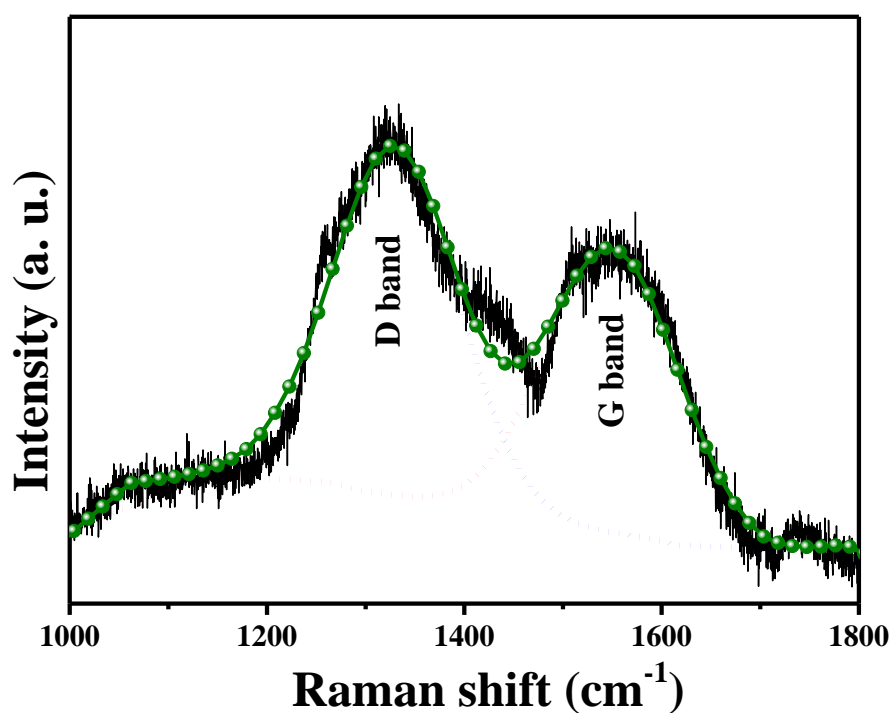

**Figure. S2** Raman spectrum of as-synthesized CDs.

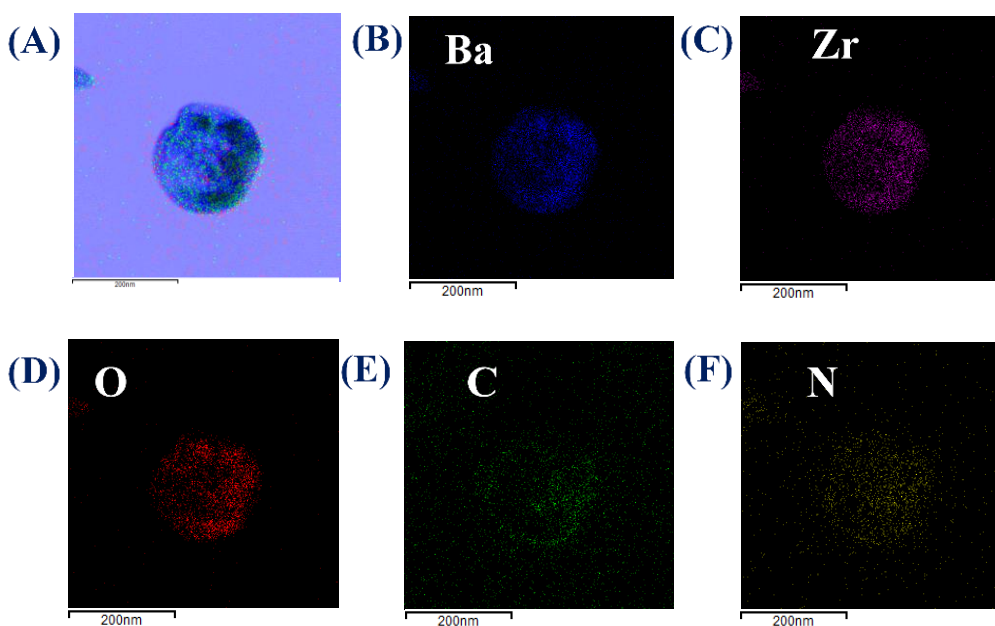

**Figure. S3** (A) Overall mapping in transmission electron microscopic (TEM) images and (B — F) shows the elemental mapping of Ba, Zr, O, C and N elements on a single 3C\_BZO hollow nanosphere.

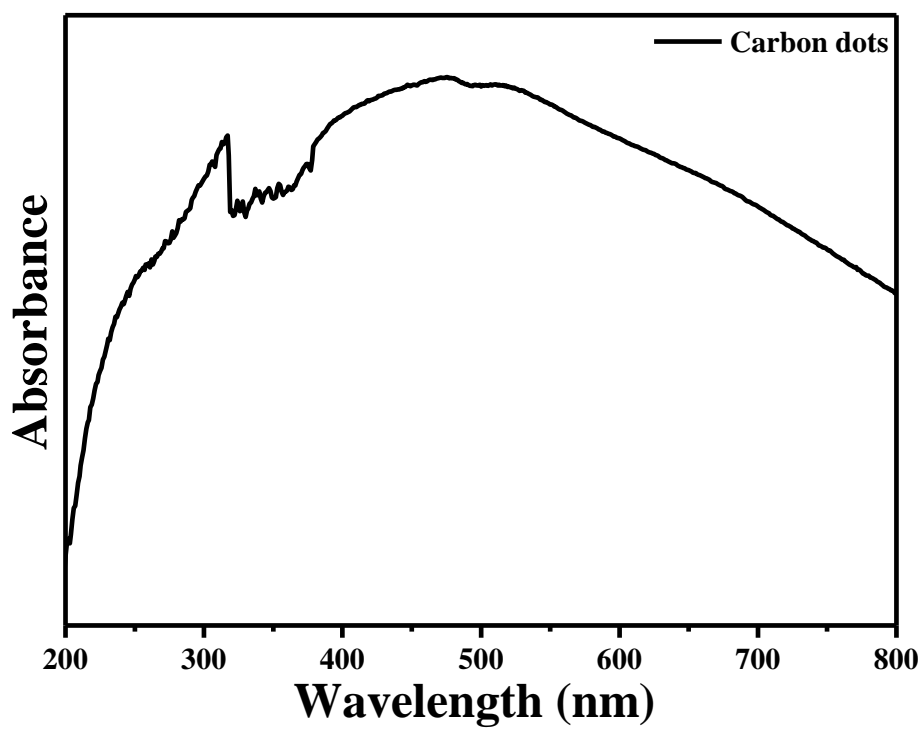

Figure. S4 Diffuse reflectance spectra of synthesized CDs.

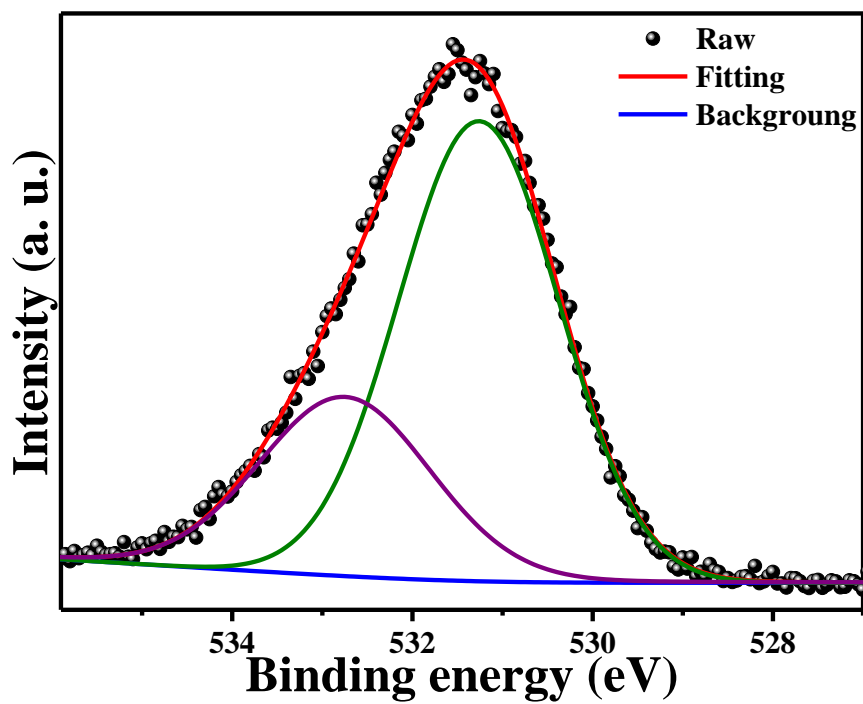

Figure. S5 O 1s core level X-ray photoelectron spectroscopic spectrum of as-synthesized CDs.

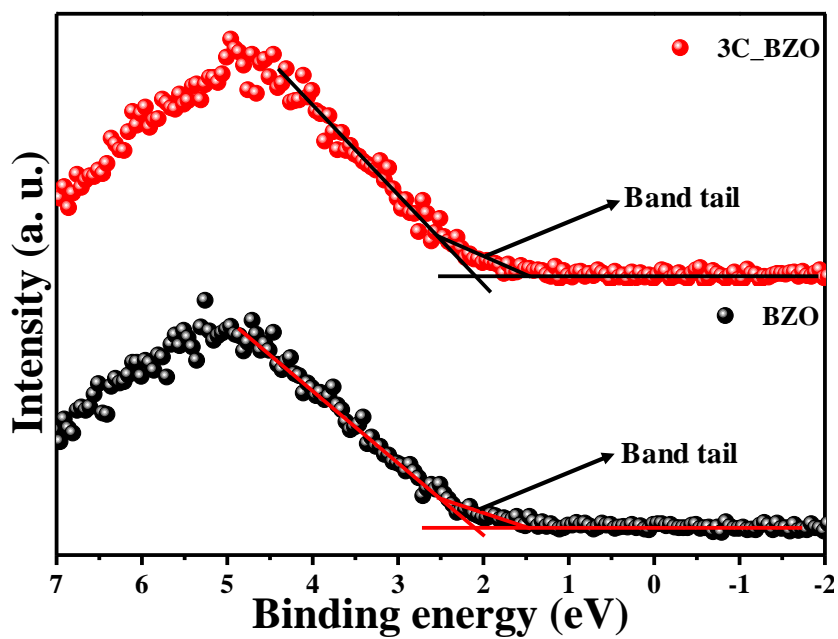

**Figure. S6** X-ray photoelectron spectroscopic valence band spectra of BZO and 3C\_ BZO hybrid nanomaterials.

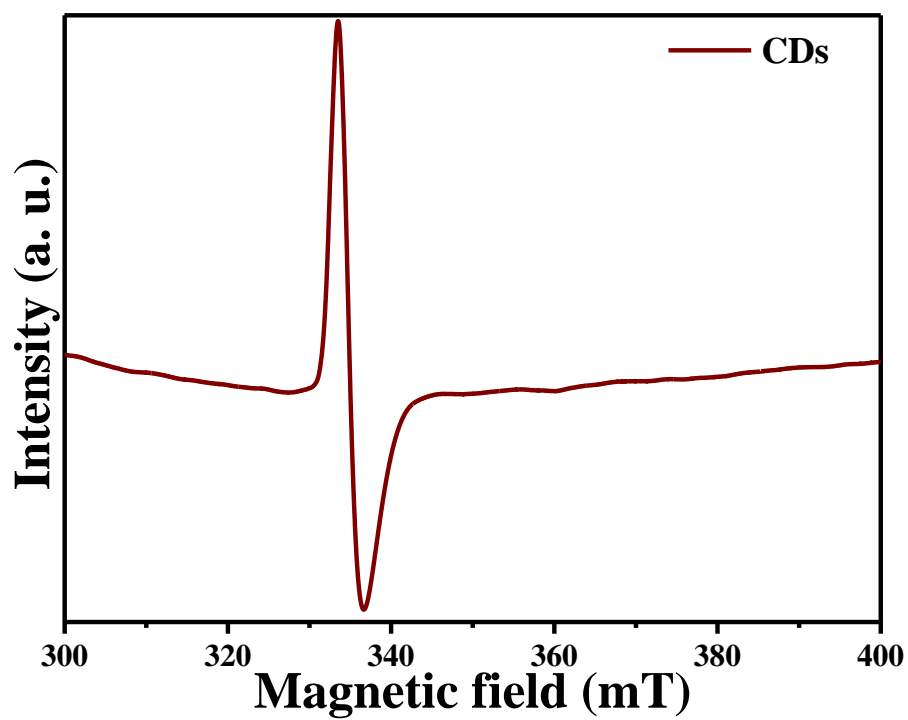

**Figure. S7** Room temperature electron spin resonance spectrum of as-synthesized CDs.
